# Supplementary material
Source: publisher site journal article supplement (https://www.degruyter.com/publication/journal_key/KERN/downloadAsset/KERN_Manuscript%20Checklist.pdf)
Supplement: Supplementary file 1 [file KERN_Manuscript%20Checklist.pdf]

## General format and length of article types accepted for submission

Word count: title page, abstract, tables, figures, references & supplementary material are excluded.

|                          | Non-typeset pages | Word count in abstract | Number of keywords | Number of tables & figures                                          | Number of references | Article                                                                                          |
|--------------------------|-------------------|------------------------|--------------------|---------------------------------------------------------------------|----------------------|--------------------------------------------------------------------------------------------------|
| <b>Research Article</b>  | 10–20             | 250                    | 3–6                | ≤10–20 for figures and tables together depending on the page count* | ≤50                  | Structured into Introduction, Materials and methods, Results, Discussion, Conclusion and outlook |
| <b>Review Article</b>    | 10–20             | 250                    | 3–6                | ≤10–20 for figures and tables together depending on the page count* | ≤100                 | Structured into Introduction, Materials and methods, Results, Discussion, Conclusion and outlook |
| <b>Proceedings Paper</b> | 10–20             | 250                    | 3–6                | ≤10–20 for figures and tables together depending on the page count* | ≤25                  | Structured into Introduction, Materials and methods, Results, Discussion, Conclusion and outlook |
| <b>Editorial</b>         | 1–2               | No abstract            | none               | none                                                                | 1–2                  |                                                                                                  |
| <b>Miscellaneous</b>     | 1–5               | 250                    | 3–6                | ≤1–5 for figures and tables together depending on the page count*   | ≤15                  |                                                                                                  |

\* For a proper text-figure/table ratio, kindly stick to the general guideline of one figure or table per page

### Structure for Research and Review Articles

#### 1 Introduction

This is your main opportunity to express to each reader that you clearly know why you have done what you describe in the text. Therefore, please

- provide relevant background information,
- perform a thorough sweep of the literature,
- put your research into a broad context to ensure that each reader (not in daily use with your topic) can understand,
- identify clearly the problem you plan to answer,

- describe and evaluate other existing answers,
- describe the main limitation of your answer,
- describe the benefit of your answer.

## 2 Materials and methods [will be formatted to petit in the typeset article]

In this section you must describe how you studied your problem. Give all details necessary to redo your work. If you present calculations, explain the important models of the programs and the modelling of the facilities with these programs, give the starting and boundary conditions. Give figures of the facilities and models and explain them. Stating only a reference to ask the readers to find out themselves it not acceptable. Describe with care to give readers a chance to understand your work.

## 3 Results

In this section you must describe what you have found. Describe representative results which are the basis for your discussion. Do not simply present any result.

## 4 Discussion

In this section you must discuss your results considering the topic you identified in the introduction. Explain the outcome. Compare to published results. Are your results consistent with published results? If not, explain.

## 5 Conclusion and outlook

Write a clear conclusion. This is not a repetition of the introduction or the results. Please give a scientific justification for your work and also a short outlook.

---

### When you submit your work, please ensure the following:

- You have read the Instruction for Authors ([Kerntechnik \(degruyter.com\)](https://www.kerntechnik.degruyter.com)).
- The manuscript is complete and uploaded correctly. The HTML version and/or the PDF file generated from the submitted files must be complete and approved.
- The language in which the manuscript was written is correct and has been checked by a native speaker or a professional language service, if applicable.
- Manuscript is spell-checked and within the page limit for the type of article (see table page 1).
- The title page includes the full title, short title, the full names of all authors (given name, middle initials, family name), and the full address, affiliation, and the academic title of the corresponding author. The title page should also indicate the word count, the number of tables and figures, and whether the submission includes any supplementary material.
- All figures and tables have been uploaded and appear correctly at the end of the generated PDF.
- Abstract, keywords, list of abbreviations, tables and figures, and captions and legends are included, depending on the manuscript type.
- References are in the correct format according to the Reference Sheet.
- References mentioned in the reference list are cited in the text and vice versa.
